# Supplementary material
Source: PubMed Central journal article supplement (PMC7147963)
Supplement: NIHMS1561664-supplement-Supplemental_Material.pdf [file NIHMS1561664-supplement-Supplemental_Material.pdf]

## SUPPLEMENTAL MATERIAL

**Supplemental Table I. Characteristics of ERICH ICH cases and controls** Note: %, percent; BMI, body mass index; n, number; NDRI, norepinephrine–dopamine reuptake inhibitor; SARI, Serotonin antagonist and reuptake inhibitors; SD, standard deviation; SNRI, serotonin–norepinephrine reuptake inhibitor; SSRI, selective serotonin reuptake inhibitor; Significance was set at  $p < 0.05$  using chi-square and t-test's as appropriate.

|                                       | <b>Cases<br/>(n=2287)</b> | <b>Controls<br/>(n=2895)</b> | <b>p-value</b> |
|---------------------------------------|---------------------------|------------------------------|----------------|
| Age, (mean), years                    | 61.7(14.0)                | 61.4(14.0)                   | 0.837          |
| Female (%)                            | 938(41.0)                 | 1205(41.6)                   | 0.658          |
| BMI, mean (SD)                        | 29.0(7.2)                 | 29.6(6.7)                    | <0.001         |
| Prior Stroke, n (%)                   | 212(9.3)                  | 39(1.3)                      | <0.001         |
| Hypertension, n (%)                   | 1760(77.0)                | 1534(53.0)                   | <0.001         |
| Diabetes, n (%)                       | 566(24.7)                 | 619(21.4)                    | 0.004          |
| High Cholesterol, n (%)               | 922(40.3)                 | 1348(46.6)                   | <0.001         |
| Heart Disease, n (%)                  | 454(19.9)                 | 396(13.7)                    | <0.001         |
| Depression, n (%)                     | 435(19.0)                 | 556(19.2)                    | 0.867          |
| Heavy Alcohol Use, n (%)              | 314(13.7)                 | 251(8.7)                     | <0.001         |
| History of Tobacco, n (%)             | 1167(51.0)                | 1515(52.3)                   | 0.351          |
| Current Tobacco Use, n (%)            | 449(19.6)                 | 505(17.4)                    | 0.044          |
| Illicit Drug Use, n (%)               | 172(7.5)                  | 146(5.0)                     | <0.001         |
| Non-Aspirin Antiplatelet Use, n (%)   | 125(5.5)                  | 110(3.8)                     | 0.004          |
| Aspirin Use, n (%)                    | 910(39.8)                 | 1208(41.7)                   | 0.159          |
| Anticoagulant Use, n (%)              | 220(9.6)                  | 91(3.1)                      | <0.001         |
| SNRI Use, n (%)                       | 146(6.4)                  | 206(7.1)                     | 0.299          |
| SARI Use, n (%)                       | 28(1.2)                   | 68(2.3)                      | 0.003          |
| NDRI Use, n (%)                       | 30(1.3)                   | 49(1.7)                      | 0.267          |
| Tricyclic Antidepressant Use, n (%)   | 9(0.4)                    | 46(1.6)                      | <0.001         |
| Tetracyclic Antidepressant Use, n (%) | 24(1.0)                   | 33(1.1)                      | 0.757          |
| Presence of APOE e2, n (%)            | 11(0.5)                   | 9(0.3)                       | 0.327          |
| Presence of APOE e4, n (%)            | 327(14.3)                 | 429(14.8)                    | 0.598          |
| BMI, mean (SD)                        | 687(30.0)                 | 787(27.2)                    | 0.024          |

**Supplemental Table II. Characteristics of propensity score matched cohorts of ICH patients with new post-ICH SSRI use versus ICH patients without new post-ICH SSRI use.** For the association of new post-ICH SSRI use and 3-month outcome, propensity score analyses were used by matching patients into the balanced, 1:1 ratio nearest neighbor approach (subjects with ICH without new, post-ICH SSRI use). Significant difference in univariate analysis set at  $p < 0.05$ . Note: %, body mass index; GCS, Glasgow Coma Scale; ICH, intracerebral hemorrhage; IVH, intraventricular hemorrhage; ml, milliliter; mRS, modified Rankin Scale; NDRI, norepinephrine–dopamine reuptake inhibitor; SARI, Serotonin antagonist and reuptake inhibitors; SNRI, serotonin–norepinephrine reuptake inhibitor; SSRI, selective serotonin reuptake inhibitor.

|                                       | <b>New SSRI use<br/>(n=208)</b> | <b>Matched<br/>Controls<br/>(n=208)</b> | <b>Total<br/>(n=416)</b> | <b>p-value</b> |
|---------------------------------------|---------------------------------|-----------------------------------------|--------------------------|----------------|
| Age, (mean), years                    | 56.0 (13.6)                     | 55.2 (12.6)                             | 55.6 (13.1)              | 0.379          |
| Female (%)                            | 79 (38.0)                       | 75 (36.1)                               | 154 (37.0)               | 0.685          |
| BMI, mean (SD)                        | 29.6 (7.1)                      | 29.6 (7.3)                              | 29.6 (7.2)               | 0.998          |
| Prior Stroke, n (%)                   | 16 (7.7)                        | 20 (9.6)                                | 36 (8.7)                 | 0.486          |
| Hypertension, n (%)                   | 161 (77.4)                      | 150 (72.1)                              | 311 (74.8)               | 0.214          |
| Diabetes, n (%)                       | 43 (20.7)                       | 42 (20.2)                               | 85 (20.4)                | 0.903          |
| High Cholesterol, n (%)               | 60 (28.8)                       | 66 (31.7)                               | 126 (30.3)               | 0.522          |
| Heart Disease, n (%)                  | 30 (14.4)                       | 24 (11.5)                               | 54 (13.0)                | 0.381          |
| Depression, n (%)                     | 37 (17.8)                       | 35 (16.8)                               | 72 (17.3)                | 0.796          |
| New Post-ICH Depression, n (%)        | 26 (12.5)                       | 12 (5.8)                                | 38 (9.1)                 | 0.017          |
| Heavy Alcohol Use, n (%)              | 30 (14.4)                       | 30 (14.4)                               | 60 (14.4)                | 1.000          |
| History of Tobacco, n (%)             | 107 (51.4)                      | 101 (48.6)                              | 208 (50.0)               | 0.556          |
| Illicit Drug Use (%)                  | 19 (9.1)                        | 20 (9.6)                                | 39 (9.4)                 | 0.866          |
| Illicit Drug Use, n (%)               | 14 (6.7)                        | 11 (5.3)                                | 25 (6.0)                 | 0.536          |
| Non-Aspirin Antiplatelet Use, n (%)   | 75 (36.1)                       | 77 (37.0)                               | 152 (36.5)               | 0.839          |
| Aspirin Use, n (%)                    | 13 (6.3)                        | 21 (10.1)                               | 34 (8.2)                 | 0.152          |
| Anticoagulant Use, n (%)              | 4 (1.9)                         | 5 (2.4)                                 | 9 (2.2)                  | 0.736          |
| SNRI Use, n (%)                       | 0 (0.0)                         | 2 (1.0)                                 | 2 (0.5)                  | 0.156          |
| SARI Use, n (%)                       | 0 (0.0)                         | 0 (0.0)                                 | 0 (0.0)                  | N/A            |
| Tricyclic Antidepressant Use, n (%)   | 2 (1.0)                         | 2 (1.0)                                 | 4 (1.0)                  | 1.000          |
| Tetracyclic Antidepressant Use, n (%) | 1 (0.5)                         | 1 (0.5)                                 | 1 (0.5)                  | 1.000          |
| Pre-ICH mRS $\geq 3$ , n (%)          | 4 (1.9)                         | 2 (1.0)                                 | 6 (1.4)                  | 0.411          |
| Admission GCS, mean (SD)              | 12.8 (3.1)                      | 12.5 (3.6)                              | 12.6 (3.4)               | 0.881          |
| Lobar, n (%)                          | 149 (71.6)                      | 150 (72.1)                              | 299 (71.9)               | 0.913          |
| Presence of IVH, n (%)                | 102 (49.0)                      | 108 (51.9)                              | 210 (50.5)               | 0.556          |
| ICH volume, mean (SD), mL             | 20.9 (21.8)                     | 22.9 (22.7)                             | 21.9 (22.2)              | 0.686          |
| Post-ICH mRS $\geq 3$ , n (%)         | 176 (84.6)                      | 170 (81.7)                              | 346 (83.2)               | 0.432          |
| 3-month mRS $\geq 3$ , n (%)          | 134 (64.4)                      | 118 (56.7)                              | 252 (60.6)               | 0.108          |

**Supplemental Table III. Case/control cohort characteristics of pre-ICH SSRI use stratified by race/ethnicity.** Significance was set at  $p < 0.05$  using chi-square and t-test's as appropriate for each race/ethnicity category. APOE, apolipoprotein E gene; %, percent; BMI, body mass index; n, number; ICH, intracerebral hemorrhage; NDRI, norepinephrine–dopamine reuptake inhibitor; SARI, Serotonin antagonist and reuptake inhibitors; SNRI, serotonin–norepinephrine reuptake inhibitor; SSRI, selective serotonin reuptake inhibitor; Significance was set at  $p < 0.05$  using chi-square and t-test's as appropriate.

|                                              | Black                |                 |         | Hispanic             |                 |         | White                |                  |         | Total                |                  |         |
|----------------------------------------------|----------------------|-----------------|---------|----------------------|-----------------|---------|----------------------|------------------|---------|----------------------|------------------|---------|
|                                              | No SSRI use (n=1634) | SSRI use (n=66) | p-value | No SSRI use (n=1621) | SSRI use (n=98) | p-value | No SSRI use (n=1575) | SSRI use (n=188) | p-value | No SSRI use (n=4830) | SSRI use (n=352) | p-value |
| <b>ICH, n (%)</b>                            | 714 (43.7)           | 24 (36.4)       | 0.239   | 730 (45.0)           | 34 (34.7)       | 0.046   | 697 (44.3)           | 88 (46.8)        | 0.505   | 2141 (44.3)          | 146 (41.5)       | 0.299   |
| <b>Lobar ICH, n (%)</b>                      | 173 (15.8)           | 6 (12.5)        | 0.535   | 184 (17.1)           | 14 (17.9)       | 0.851   | 289 (24.8)           | 40 (28.6)        | 0.327   | 646 (19.4)           | 60 (22.6)        | 0.208   |
| <b>Non-lobar ICH, n (%)</b>                  | 541 (37.0)           | 18 (30.0)       | 0.268   | 546 (38.0)           | 20 (23.8)       | 0.009   | 408 (31.7)           | 48 (32.4)        | 0.861   | 1495 (35.7)          | 86 (29.5)        | 0.030   |
| <b>Age, mean (SD), years</b>                 | 57.6 (12.3)          | 59.5 (10.0)     | 0.110   | 57.9 (14.2)          | 64.7 (12.3)     | <0.001  | 68.5 (12.8)          | 68.1 (12.4)      | 0.654   | 61.2 (14.1)          | 65.6 (12.4)      | <0.001  |
| <b>Female, n (%)</b>                         | 677 (41.4)           | 46 (69.7)       | <0.001  | 578 (35.7)           | 57 (58.2)       | <0.001  | 668 (42.4)           | 117 (62.2)       | <0.001  | 1923 (39.8)          | 220 (62.5)       | <0.001  |
| <b>BMI, mean (SD)</b>                        | 30.1 (7.4)           | 31.2 (8.6)      | .398    | 29.8 (6.4)           | 30.8 (5.9)      | 0.042   | 28.0 (6.6)           | 29.1 (7.4)       | 0.076   | 29.3 (6.9)           | 30.0 (7.3)       | 0.149   |
| <b>Prior Stroke, n (%)</b>                   | 71 (4.3)             | 10 (15.2)       | <0.001  | 78 (4.8)             | 14 (14.3)       | <0.001  | 66 (4.2)             | 12 (6.4)         | 0.167   | 215 (4.5)            | 36 (10.2)        | <0.001  |
| <b>Hypertension, n (%)</b>                   | 1145 (70.1)          | 55 (83.3)       | 0.021   | 950 (58.6)           | 77 (78.6)       | <0.001  | 951 (60.4)           | 116 (61.7)       | 0.726   | 3046 (63.1)          | 248 (70.5)       | 0.005   |
| <b>Diabetes, n (%)</b>                       | 356 (21.8)           | 23 (34.8)       | 0.012   | 441 (27.2)           | 49 (50.0)       | <0.001  | 268 (17.0)           | 48 (25.)         | 0.004   | 1065 (22.0)          | 120 (34.1)       | <0.001  |
| <b>High Cholesterol, n (%)</b>               | 598 (36.6)           | 45 (68.2)       | <0.001  | 661 (40.8)           | 66 (67.3)       | <0.001  | 779 (49.5)           | 121 (64.4)       | <0.001  | 2038 (42.2)          | 232 (65.9)       | <0.001  |
| <b>Heart Disease, n (%)</b>                  | 174 (10.6)           | 12 (18.2)       | 0.055   | 176 (10.9)           | 25 (25.5)       | <0.001  | 411 (26.1)           | 52 (27.7)        | 0.645   | 761 (15.8)           | 89 (25.3)        | <0.001  |
| <b>Depression, n (%)</b>                     | 204 (12.5)           | 54 (81.8)       | <0.001  | 270 (16.7)           | 82 (83.7)       | <0.001  | 255 (16.2)           | 126 (67.0)       | <0.001  | 729 (15.1)           | 262 (74.4)       | <0.001  |
| <b>Heavy Alcohol Use, n (%)</b>              | 188 (11.5)           | 6 (9.1)         | 0.545   | 172 (10.6)           | 7 (7.1)         | 0.275   | 183 (11.6)           | 9 (4.8)          | 0.005   | 543 (11.2)           | 22 (6.3)         | 0.003   |
| <b>Prior Tobacco, n (%)</b>                  | 911 (55.8)           | 38 (57.6)       | 0.770   | 727 (44.8)           | 56 (57.1)       | 0.018   | 841 (53.4)           | 109 (58.0)       | 0.234   | 2479 (51.3)          | 203 (57.7)       | 0.021   |
| <b>Current Tobacco Use, n (%)</b>            | 473 (28.9)           | 20 (30.3)       | 0.812   | 228 (14.1)           | 12 (12.2)       | 0.614   | 203 (12.9)           | 18 (9.6)         | 0.195   | 904 (18.7)           | 50 (14.2)        | 0.035   |
| <b>Illicit Drug Use, n (%)</b>               | 155 (9.5)            | 6 (9.1)         | 0.914   | 100 (6.2)            | 4 (4.1)         | 0.400   | 50 (3.2)             | 3 (1.6)          | 0.231   | 305 (6.3)            | 13 (3.7)         | 0.048   |
| <b>Non-Aspirin Antiplatelet Use, n (%)</b>   | 47 (2.9)             | 5 (7.6)         | 0.028   | 56 (3.5)             | 12 (12.2)       | <0.001  | 101 (6.4)            | 14 (7.4)         | 0.587   | 204 (4.2)            | 31 (8.8)         | <0.001  |
| <b>Aspirin Use, n (%)</b>                    | 613 (37.5)           | 31 (47.0)       | 0.121   | 565 (34.9)           | 47 (48.0)       | <0.001  | 767(48.7)            | 95 (50.5)        | 0.635   | 1945 (40.3)          | 173 (49.1)       | 0.001   |
| <b>Anticoagulant Use, n (%)</b>              | 54 (3.3)             | 2 (3.0)         | 1       | 70 (4.3)             | 13 (13.3)       | <0.001  | 165(10.5)            | 28 (14.9)        | 0.087   | 289 (6.0)            | 43 (12.2)        | <0.001  |
| <b>SNRI Use, n (%)</b>                       | 14 (0.9)             | 1 (1.5)         | 0.575   | 24 (1.5)             | 0 (0.0)         | 0.225   | 54(3.4)              | 3 (1.6)          | 0.179   | 92 (1.9)             | 4 (1.1)          | 0.302   |
| <b>SARI Use, n (%)</b>                       | 16 (1.0)             | 5 (7.6)         | <0.001  | 17 (1.0)             | 6 (6.1)         | <0.001  | 23(1.5)              | 12 (6.4)         | <0.001  | 56 (1.2)             | 23 (6.5)         | <0.001  |
| <b>NDRI Use, n (%)</b>                       | 7 (0.4)              | 7 (10.6)        | <0.001  | 11 (0.7)             | 5 (5.1)         | <0.001  | 15(1.0)              | 10 (5.3)         | <0.001  | 33 (0.7)             | 22 (6.3)         | <0.001  |
| <b>Tricyclic Antidepressant Use, n (%)</b>   | 11 (0.7)             | 3 (4.5)         | <0.001  | 18 (1.1)             | 2 (2.0)         | 0.404   | 20(1.3)              | 3 (1.6)          | 0.710   | 49 (1.0)             | 8 (2.3)          | 0.029   |
| <b>Tetracyclic Antidepressant Use, n (%)</b> | 3 (0.2)              | 0 (0.0)         | 0.728   | 6 (0.4)              | 1 (1.0)         | 0.326   | 7(0.4)               | 3 (1.6)          | 0.047   | 16 (0.3)             | 4 (1.1)          | 0.019   |

|                                       |            |           |       |            |           |       |           |           |       |             |            |       |
|---------------------------------------|------------|-----------|-------|------------|-----------|-------|-----------|-----------|-------|-------------|------------|-------|
| <b>Presence of APOE e2,<br/>n (%)</b> | 308 (18.8) | 10 (15.2) | 0.450 | 119 (7.3)  | 11 (11.2) | 0.158 | 280(17.8) | 29 (14.9) | 0.325 | 707 (14.6)  | 49 (13.9)  | 0.713 |
| <b>Presence of APOE e4,<br/>n (%)</b> | 620 (37.9) | 29 (43.9) | 0.326 | 338 (20.9) | 19 (19.4) | 0.729 | 413(26.2) | 55 (29.3) | 0.373 | 1371 (28.4) | 103 (29.3) | 0.725 |

**Supplemental Table IV. Multivariable modeling of associations between pre-ICH SSRI use and ICH risk, stratified by race/ethnicity.** Regression models for ICH and subtypes were created for each race/ethnicity and adjusted for BMI, history of stroke, history of depression, history of heart disease, history of hypertension, high cholesterol, heavy alcohol use, use of street drugs. Presence of APOE2 and E4 alleles were included in lobar ICH models only. Significance was set at  $p < 0.05$ . Note: %, percent; CI, confidence interval; ICH, intracerebral hemorrhage; SSRI, selective serotonin reuptake inhibitor; OR, odds ratio.

| New SSRI Use            | Black                   |         | Hispanic                |         | White                   |         |
|-------------------------|-------------------------|---------|-------------------------|---------|-------------------------|---------|
|                         | OR (95% CI)             | p-value | OR (95% CI)             | p-value | OR (95% CI)             | p-value |
| <b>Any ICH location</b> | 0.850<br>(0.445, 1.623) | 0.622   | 0.513<br>(0.301, 0.875) | 0.014   | 0.940<br>(0.658, 1.342) | 0.733   |
| <b>Lobar ICH</b>        | 0.696<br>(0.239, 2.026) | 0.506   | 0.680<br>(0.327, 1.415) | 0.303   | 1.065<br>(0.676, 1.678) | 0.787   |
| <b>Non-lobar ICH</b>    | 0.913<br>(0.452, 1.845) | 0.800   | 0.398<br>(0.210, 0.753) | 0.005   | 0.809<br>(0.523, 1.252) | 0.342   |

**Supplemental Table V. Multivariable model of association between new, post-ICH SSRI user and 3-month ICH outcome (mRS<sub>≥3</sub>) stratified by race/ethnicity, including *a priori* covariates.** Regression models for each race/ethnicity was adjusted for the listed covariates. Significance was set at p< 0.05. Note: CI, confidence interval; GCS, Glasgow Coma Scale; ICH, intracerebral hemorrhage; IVH, intraventricular hemorrhage; mRS, modified Rankin score; OR, odds ratio; SSRI, selective serotonin reuptake inhibitor.

| Predictor                        | Black                 |         | Hispanic              |         | White                  |         |
|----------------------------------|-----------------------|---------|-----------------------|---------|------------------------|---------|
|                                  | OR (95% CI)           | p-value | OR (95% CI)           | p-value | OR (95% CI)            | p-value |
| New SSRI Use                     | 1.713 (0.896, 3.276)  | 0.104   | 1.392 (0.714, 2.714)  | 0.332   | 1.770 (0.900, 3.480)   | 0.098   |
| Age (per year)                   | 1.038 (1.018, 1.059)  | <0.001  | 1.047 (1.029, 1.065)  | <0.001  | 1.044 (1.025, 1.064)   | <0.001  |
| Female                           | 1.148 (0.760, 1.736)  | 0.512   | 1.933 (1.250, 2.992)  | 0.003   | 1.496 (0.938, 2.385)   | 0.090   |
| Prior Stroke                     | 2.838 (1.336, 6.026)  | 0.007   | 1.453 (0.672, 3.146)  | 0.343   | 1.667 (0.780, 3.560)   | 0.187   |
| Diabetes                         | 1.131 (0.697, 1.834)  | 0.619   | 1.723 (1.092, 2.718)  | 0.019   | 1.339 (0.771, 2.326)   | 0.300   |
| History of Depression            | 1.551 (0.863, 2.788)  | 0.142   | 1.346 (0.771, 2.350)  | 0.295   | 1.479 (0.867, 2.523)   | 0.151   |
| Post-ICH Depression              | 1.665 (0.530, 5.233)  | 0.383   | 1.159 (0.278, 4.829)  | 0.840   | 1.200 (0.257, 5.593)   | 0.817   |
| Pre-ICH mRS $\geq 3$             | 7.129 (2.363, 21.505) | <0.001  | 5.966 (1.370, 25.978) | 0.017   | 4.427 (1.602, 12.239)  | 0.004   |
| Lobar Location                   | 0.316 (0.175, 0.568)  | <0.001  | 0.378 (0.215, 0.663)  | <0.001  | 0.412 (0.246, 0.691)   | <0.001  |
| ICH Volume (per mL)              | 1.046 (1.026, 1.066)  | <0.001  | 1.053 (1.034, 1.072)  | <0.001  | 1.032 (1.015, 1.048)   | <0.001  |
| IVH Present                      | 1.010 (0.661, 1.544)  | 0.964   | 1.345 (0.869, 2.083)  | 0.189   | 1.353 (0.834, 2.195)   | 0.221   |
| Initial GCS (per point increase) | 0.894 (0.836, 0.956)  | 0.001   | 0.901 (0.837, 0.969)  | 0.005   | 0.876 (0.795, 0.965)   | 0.008   |
| Discharge mRS $\geq 3$           | 3.615 (2.179, 5.997)  | <0.001  | 5.137 (3.098, 8.519)  | <0.001  | 10.542 (5.666, 19.616) | <0.001  |
